# Supplementary material
Source: PubMed Central journal article supplement (PMC6490677)
Supplement: NIHMS1018580-supplement-1.pdf [file NIHMS1018580-supplement-1.pdf]

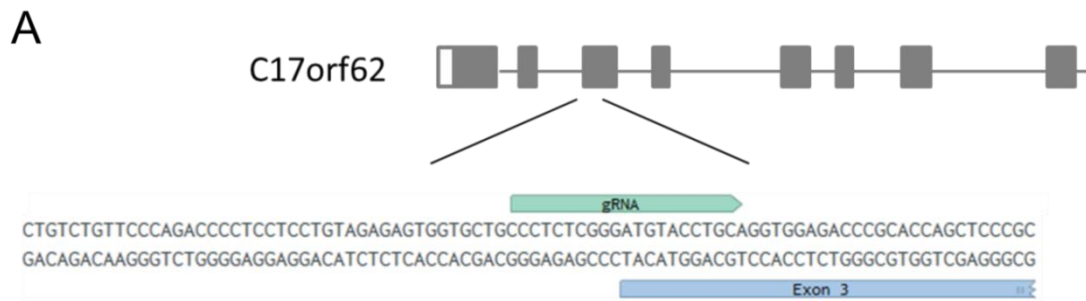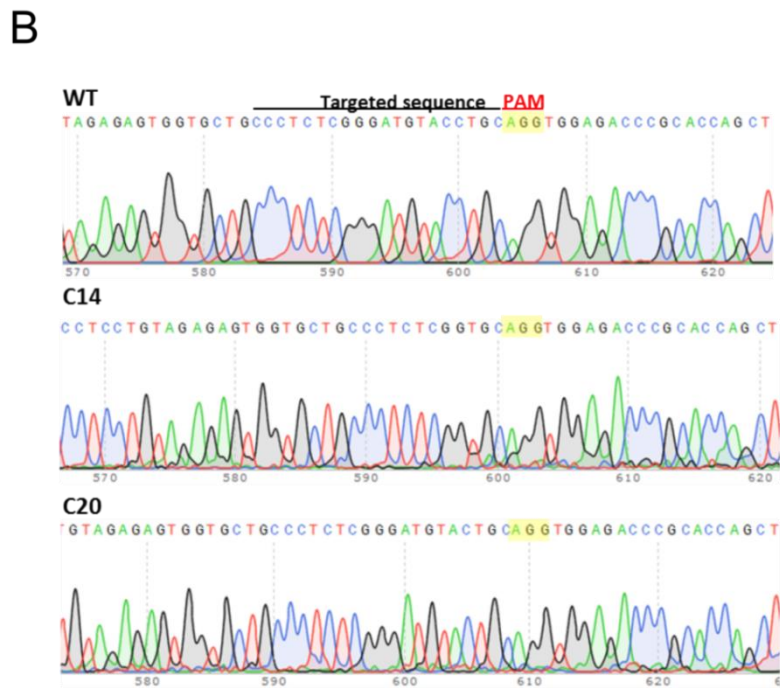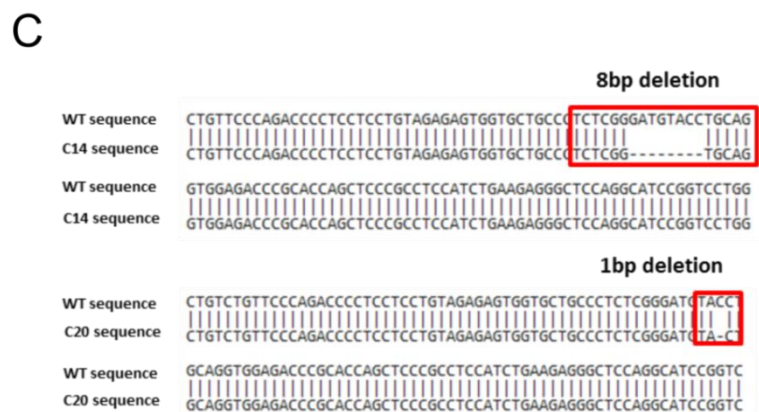

**Figure S1: Targeting of EROS for deletion by CRISPR-Cas9** (A) Schematic representation of the human *CYBC1* genomic locus and of guide RNA targeting exon 3 (B, C) Sequencing analysis from two clones derived from PLB985 cells that had been electroporated with Cas9:gRNA ribonucleoprotein complex, showing deletion of 8bp in clone 14 and deletion of 1 bp in clone 20.
